# Supplementary material for: Light-driven molecular trap enables bidirectional manipulation of dynamic covalent systems
Source: Springer Nature journal article supplement (doi:10.1038/s41557-018-0106-8), 2018-08-10
Supplement: 41557_2018_106_MOESM4_ESM.mol [file 41557_2018_106_MOESM4_ESM.mol]

nchem.17102108B-comp1.mol
  ChemDraw06181812252D

 29 31  0  0  0  0  0  0  0  0999 V2000
    1.5530    1.1425    0.0000 B   0  0  0  0  0  0  0  0  0  0  0  0
    2.3780    1.1425    0.0000 O   0  0  0  0  0  0  0  0  0  0  0  0
    2.6329    1.9268    0.0000 C   0  0  0  0  0  0  0  0  0  0  0  0
    1.9655    2.4121    0.0000 C   0  0  0  0  0  0  0  0  0  0  0  0
    1.2980    1.9268    0.0000 O   0  0  0  0  0  0  0  0  0  0  0  0
    1.0681    0.4750    0.0000 C   0  0  0  0  0  0  0  0  0  0  0  0
    0.2431    0.4749    0.0000 C   0  0  0  0  0  0  0  0  0  0  0  0
   -0.0118   -0.3097    0.0000 C   0  0  0  0  0  0  0  0  0  0  0  0
    0.6557   -0.7946    0.0000 S   0  0  0  0  0  0  0  0  0  0  0  0
    1.3231   -0.3097    0.0000 C   0  0  0  0  0  0  0  0  0  0  0  0
    2.1077   -0.5647    0.0000 C   0  0  0  0  0  0  0  0  0  0  0  0
   -0.7964   -0.5647    0.0000 C   0  0  0  0  0  0  0  0  0  0  0  0
    1.9655    3.2371    0.0000 C   0  0  0  0  0  0  0  0  0  0  0  0
    2.5489    2.9954    0.0000 C   0  0  0  0  0  0  0  0  0  0  0  0
    3.4176    2.1816    0.0000 C   0  0  0  0  0  0  0  0  0  0  0  0
    3.0454    2.6413    0.0000 C   0  0  0  0  0  0  0  0  0  0  0  0
   -1.4095   -0.0128    0.0000 C   0  0  0  0  0  0  0  0  0  0  0  0
   -2.1941   -0.2678    0.0000 C   0  0  0  0  0  0  0  0  0  0  0  0
   -2.3656   -1.0747    0.0000 C   0  0  0  0  0  0  0  0  0  0  0  0
   -1.7524   -1.6267    0.0000 C   0  0  0  0  0  0  0  0  0  0  0  0
   -0.9678   -1.3717    0.0000 C   0  0  0  0  0  0  0  0  0  0  0  0
   -1.9239   -2.4337    0.0000 C   0  0  0  0  0  0  0  0  0  0  0  0
   -2.7272   -2.2630    0.0000 F   0  0  0  0  0  0  0  0  0  0  0  0
   -2.0945   -3.2371    0.0000 F   0  0  0  0  0  0  0  0  0  0  0  0
   -1.1205   -2.6044    0.0000 F   0  0  0  0  0  0  0  0  0  0  0  0
   -2.8072    0.2842    0.0000 C   0  0  0  0  0  0  0  0  0  0  0  0
   -2.2578    0.8946    0.0000 F   0  0  0  0  0  0  0  0  0  0  0  0
   -3.4176    0.8337    0.0000 F   0  0  0  0  0  0  0  0  0  0  0  0
   -3.3567   -0.3262    0.0000 F   0  0  0  0  0  0  0  0  0  0  0  0
 22 23  1  0      
 22 24  1  0      
 22 25  1  0      
 20 22  1  0      
 26 27  1  0      
 26 28  1  0      
 26 29  1  0      
 18 26  1  0      
  1  2  1  0      
  2  3  1  0      
  3  4  1  0      
  4  5  1  0      
  5  1  1  0      
  1  6  1  0      
  6  7  1  0      
  7  8  2  0      
  8  9  1  0      
  9 10  1  0      
 10  6  2  0      
 10 11  1  0      
  8 12  1  0      
  4 13  1  0      
  4 14  1  0      
  3 15  1  0      
  3 16  1  0      
 12 17  2  0      
 17 18  1  0      
 18 19  2  0      
 19 20  1  0      
 20 21  2  0      
 21 12  1  0      
M  STY  1   1 SUP
M  SLB  1   1   1
M  SAL   1  4  22  23  24  25
M  SBL   1  1   4
M  SMT   1 ^CF3
M  SBV   1   4    0.1715    0.8070
M  STY  1   2 SUP
M  SLB  1   2   2
M  SAL   2  4  26  27  28  29
M  SBL   2  1   8
M  SMT   2 ^CF3
M  SBV   2   8    0.6131   -0.5520
M  END
